# Supplementary material for: Quercetin 3- O -rutinoside mediated inhibition of PBP2a: computational and experimental evidence to its anti-MRSA activity
Source: Royal Society of Chemistry journal article supplement (doi:10.1039/c4mb00319e), 2014-09-25
Supplement: c4mb00319e1.pdf [file c4mb00319e1.pdf]

- 1 **Supplementary**  
2 **Table T1. Quercetin derivatives used in this study**  
3

| S.NO | Compounds                | Structure                                                                           | ZINC         |
|------|--------------------------|-------------------------------------------------------------------------------------|--------------|
| 1.   | Quercetin                | 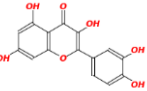   | ZINC03869685 |
| 2.   | Myricetin                |    | ZINC03874317 |
| 3.   | Quercetagetin            |    | ZINC05784821 |
| 4.   | Robinetin                |    | ZINC04098600 |
| 5.   | Pinoquercetin            |  | ZINC06520226 |
| 6.   | Myricetin                |  | ZINC14436449 |
| 7.   | Tamarixetin              |  | ZINC06484604 |
| 8.   | Quercetin-3-O-Rutinoside |  | ZINC53683228 |
| 9.   | Fisetin                  |  | ZINC00039111 |

|     |                                                                                  |                                                                                     |                     |
|-----|----------------------------------------------------------------------------------|-------------------------------------------------------------------------------------|---------------------|
| 10. | <b>Gossypetin</b>                                                                | 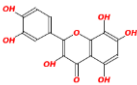   | <b>ZINC06525297</b> |
| 11. | <b>Kaempferol</b>                                                                |    | <b>ZINC03869768</b> |
| 12. | <b>Rhamnetin</b>                                                                 |    | <b>ZINC03875620</b> |
| 13. | <b>Isorhamnetin</b>                                                              |    | <b>ZINC00517261</b> |
| 14. | <b>3,7,3'-Trihydroxyflavone</b>                                                  |    | <b>ZINC00057845</b> |
| 15. | <b>2-(3,4-Dihydroxyphenyl)-<br/>3,5,7-Trihydroxy-8-<br/>Methyl-Chromen-4-One</b> |   | <b>ZINC04731234</b> |
| 16. | <b>Galangin</b>                                                                  |  | <b>ZINC00120273</b> |
| 17. | <b>Azaleatin</b>                                                                 |  | <b>ZINC05998785</b> |
| 18. | <b>Syringetin</b>                                                                |  | <b>ZINC06483609</b> |
| 19. | <b>3,5,7-Trihydroxy-3',4',5'-<br/>Trimethoxyflavone</b>                          |  | <b>ZINC06483700</b> |
| 20. | <b>Rhamnazin</b>                                                                 |  | <b>ZINC06403375</b> |

|     |                                                                             |                                                                                     |                     |
|-----|-----------------------------------------------------------------------------|-------------------------------------------------------------------------------------|---------------------|
| 21. | <b>3,3',4'-Trihydroxyflavone</b>                                            | 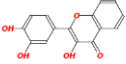   | <b>ZINC00039321</b> |
| 22. | <b>Kaempferide</b>                                                          |    | <b>ZINC06411540</b> |
| 23. | <b>Morin</b>                                                                |    | <b>ZINC03881558</b> |
| 24. | <b>3,6,4'-Trihydroxyflavone</b>                                             |    | <b>ZINC00057752</b> |
| 25. | <b>3,4',5,7,8-Pentahydroxyflavone</b>                                       |    | <b>ZINC06536276</b> |
| 26. | <b>3-O-Methyl Quercetin</b>                                                 |   | <b>ZINC05998596</b> |
| 27. | <b>3,6,3',4'-Tetrahydroxyflavone</b>                                        |  | <b>ZINC00008662</b> |
| 28. | <b>3,7-Dihydroxy-3',4',5'-Trimethoxyflavone; (Robinetin Trimethylether)</b> |  | <b>ZINC02146994</b> |
| 29. | <b>3'-Methoxy-3,7,4'-Trihydroxyflavone</b>                                  |  | <b>ZINC05732763</b> |
| 30. | <b>3,6,2',4',5'-Pentahydroxyflavone</b>                                     |  | <b>ZINC48057104</b> |
| 31. | <b>Quercetin 3,4'-Dimethyl Ether</b>                                        |  | <b>ZINC05640267</b> |

---

32. **3,3',5-Trihydroxy-4',6,7-Trimethoxyflavone**

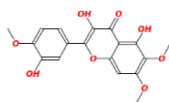

ZINC05733650

33. **2-(2,6-Dihydroxyphenyl)-3,5,7-Trihydroxy-Chromen-4-One**

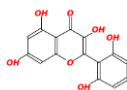

ZINC14644239

34. **Datisacetin**

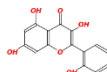

ZINC06095498

35. **Quercetin 3-O-Sulfate**

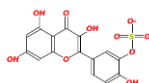

ZINC14644472

36. **Quercetin-7-O-Glucoside**

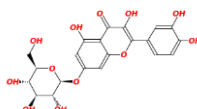

ZINC04654813

37. **Quercitrin**

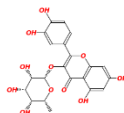

ZINC04416338

38. **Ceftobiprole**

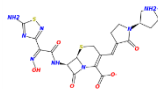

ZINC04424091

---

1  
2  
3  
4  
5  
6  
7  
8  
9  
10  
11  
12  
13  
14  
15  
16  
17

1 **Table T2. Docking result of Quercetin 3-O-rutinoside and Ceftobiprole in allosteric site of PBP2a.**

| <b>Ligands</b>           | <b>Glide Score</b> | <b>Number of H-Bond</b> | <b>H-bond forming Residues</b> | <b>H-bond length (Å)</b> |
|--------------------------|--------------------|-------------------------|--------------------------------|--------------------------|
| Quercetin 3-O-rutinoside | -7.790318          | 6                       | ASN104                         | 1.82                     |
|                          |                    |                         | ASN146                         | 2.22                     |
|                          |                    |                         | VAL277                         | 2.04                     |
|                          |                    |                         | ASP295                         | 2.07                     |
|                          |                    |                         | HIS293                         | 2.11                     |
|                          |                    |                         | GLN292                         | 1.84                     |
| Ceftobiprole             | -5.194946          | 3                       | Tyr105                         | 3.09                     |
|                          |                    |                         | Lys273                         | 2.68                     |
|                          |                    |                         | Lys316                         | 2.71                     |

2
